# Supplementary material
Source: publisher figshare collection journal article supplement (https://tandf.figshare.com/articles/dataset/_/5878663)
Supplement: Supplementary file 1 [file 2]

## SUPPLEMENTARY MATERIAL

### A Appendix

This appendix verifies equation (16): for any past and future screening number  $K_1 \geq 1$  and  $K \geq 1$ ,

$$\begin{aligned} \sum_{i=1}^4 P(\text{Case } i, H_{K_1} | T = t_{K_1+K}) &= P(H_{K_1} | T \geq t_{K_1}) \\ &= 1 - \int_0^{t_{K_1}} w(x) dx + \int_{t_{K_1-1}}^{t_{K_1}} w(x) Q(t_{K_1} - x) dx \\ &\quad + \sum_{j=0}^{K_1-1} (1 - \beta_j) \cdots (1 - \beta_{K_1-1}) \int_{t_{j-1}}^{t_j} w(x) Q(t_{K_1} - x) dx. \end{aligned}$$

First, we combine the probabilities of case 3 and 4, since they are similar. Denote by  $I$  their sum:

$$\begin{aligned} I &= P(\text{Case 3}, H_{K_1} | T = t_{K_1+K}) + P(\text{Case 4}, H_{K_1} | T = t_{K_1+K}) \\ &= \sum_{j=K_1}^{K_1+K-1} \beta_j \left\{ \sum_{i=0}^{j-1} (1 - \beta_i) \cdots (1 - \beta_{j-1}) \int_{t_{i-1}}^{t_i} w(x) Q(t_j - x) dx \right. \\ &\quad \left. + \int_{t_{j-1}}^{t_j} w(x) Q(t_j - x) dx \right\}. \end{aligned}$$

We split  $P\{\text{Case 2}, H_{K_1} | T = t_{K_1+K}\}$  into 4 items, denoted II, III, IV, V, as follows:

$$\begin{aligned} &P(\text{Case 2}, H_{K_1} | T = t_{K_1+K}) \tag{1} \\ &= \sum_{j=K_1+1}^{K_1+K} \left\{ \sum_{i=0}^{j-1} (1 - \beta_i) \cdots (1 - \beta_{j-1}) \int_{t_{i-1}}^{t_i} w(x) [Q(t_{j-1} - x) - Q(t_j - x)] dx \right. \\ &\quad \left. + \int_{t_{j-1}}^{t_j} w(x) [1 - Q(t_j - x)] dx \right\} \\ &= \sum_{j=K_1+1}^{K_1+K} \sum_{i=0}^{j-1} (1 - \beta_i) \cdots (1 - \beta_{j-1}) \int_{t_{i-1}}^{t_i} w(x) Q(t_{j-1} - x) dx \\ &\quad - \sum_{j=K_1+1}^{K_1+K} \sum_{i=0}^{j-1} (1 - \beta_i) \cdots (1 - \beta_{j-1}) \int_{t_{i-1}}^{t_i} w(x) Q(t_j - x) dx \\ &\quad + \sum_{j=K_1+1}^{K_1+K} \int_{t_{j-1}}^{t_j} w(x) dx - \sum_{j=K_1+1}^{K_1+K} \int_{t_{j-1}}^{t_j} w(x) Q(t_j - x) dx = II - III + IV - V. \end{aligned}$$

We combines items I and II, and cancel redundant items, first by changing the index  $l = j - 1$  in item II, then changing  $l$  back to  $j$ :

$$\begin{aligned}
II &= \sum_{l=K_1}^{K_1+K-1} \sum_{i=0}^l (1 - \beta_i) \cdots (1 - \beta_l) \int_{t_{i-1}}^{t_i} w(x) Q(t_l - x) dx \\
&= \sum_{j=K_1}^{K_1+K-1} \sum_{i=0}^j (1 - \beta_i) \cdots (1 - \beta_j) \int_{t_{i-1}}^{t_i} w(x) Q(t_j - x) dx \\
&= \sum_{j=K_1}^{K_1+K-1} (1 - \beta_j) \left\{ \sum_{i=0}^{j-1} (1 - \beta_i) \cdots (1 - \beta_{j-1}) \int_{t_{i-1}}^{t_i} w(x) Q(t_j - x) dx \right. \\
&\quad \left. + \int_{t_{j-1}}^{t_j} w(x) Q(t_j - x) dx \right\}.
\end{aligned} \tag{2}$$

Hence,

$$\begin{aligned}
I + II &= \sum_{j=K_1}^{K_1+K-1} \sum_{i=0}^{j-1} (1 - \beta_i) \cdots (1 - \beta_{j-1}) \int_{t_{i-1}}^{t_i} w(x) Q(t_j - x) dx \\
&\quad + \sum_{j=K_1}^{K_1+K-1} \int_{t_{j-1}}^{t_j} w(x) Q(t_j - x) dx.
\end{aligned}$$

Notice that the first term in  $I + II$  is similar to that of III, the second term in  $I + II$  is similar to that of V, and  $IV = \int_{t_{K_1}}^{t_{K_1+K}} w(x) dx$ . This leads to

$$\begin{aligned}
\sum_{i=2}^4 P(\text{Case } i, H_{K_1} | T = t_{K_1+K}) &= I + II - III + IV - V \\
&= \sum_{i=0}^{K_1-1} (1 - \beta_i) \cdots (1 - \beta_{K_1-1}) \int_{t_{i-1}}^{t_i} w(x) Q(t_{K_1} - x) dx \\
&\quad - \sum_{i=0}^{K_1+K-1} (1 - \beta_i) \cdots (1 - \beta_{K_1+K-1}) \int_{t_{i-1}}^{t_i} w(x) Q(t_{K_1+K} - x) dx \\
&\quad + \int_{t_{K_1-1}}^{t_{K_1}} w(x) Q(t_{K_1} - x) dx - \int_{t_{K_1+K-1}}^{t_{K_1+K}} w(x) Q(t_{K_1+K} - x) dx + \int_{t_{K_1}}^{t_{K_1+K}} w(x) dx.
\end{aligned}$$

Compare with:

$$\begin{aligned}
P(\text{Case } 1, H_{K_1} | T = t_{K_1+K}) &= 1 - \int_0^{t_{K_1+K}} w(x) dx + \int_{t_{K_1+K-1}}^{t_{K_1+K}} w(x) Q(t_{K_1+K} - x) dx \\
&\quad + \sum_{j=0}^{K_1+K-1} (1 - \beta_j) \cdots (1 - \beta_{K_1+K-1}) \int_{t_{j-1}}^{t_j} w(x) Q(t_{K_1+K} - x) dx.
\end{aligned}$$

Many terms will cancel, leaving

$$\begin{aligned}
& \sum_{i=1}^4 P(\text{Case } i, H_{K_1} | T = t_{K_1+K}) \\
&= 1 - \int_0^{t_{K_1}} w(x) dx + \sum_{i=0}^{K_1-1} (1 - \beta_i) \cdots (1 - \beta_{K_1-1}) \int_{t_{i-1}}^{t_i} w(x) Q(t_{K_1} - x) dx \\
&\quad + \int_{t_{K_1-1}}^{t_{K_1}} w(x) Q(t_{K_1} - x) dx \\
&= P(H_{K_1} | T \geq t_{K_1}).
\end{aligned}$$

This completes the proof.
